# Supplementary material for: A single faecal microbiota transplantation modulates the microbiome and improves clinical manifestations in a rat model of colitis
Source: PubMed Central journal article supplement — eBioMedicine. 2019 Oct 15;48:630–41. doi: 10.1016/j.ebiom.2019.10.002 (PMC6838378; doi:10.1016/j.ebiom.2019.10.002), 2019-10-15
Supplement: mmc1.pdf [file mmc1.pdf]

**Supplementary Table S1. DAI score evaluation**

| Weight loss | Score | Blood in stool  | Score | Stool consistency | Score |
|-------------|-------|-----------------|-------|-------------------|-------|
| <1%         | 0     | Absence         | 0     | Normal            | 0     |
| 1-5%        | 1     |                 | 1     | Soft stools       | 1     |
| 5-10%       | 2     | Slight bleeding | 2     | Loose stools      | 2     |
| 10-15%      | 3     |                 | 3     | Mild diarrhea     | 3     |
| >15%        | 4     | Gross bleeding  | 4     | Watery diarrhea   | 4     |

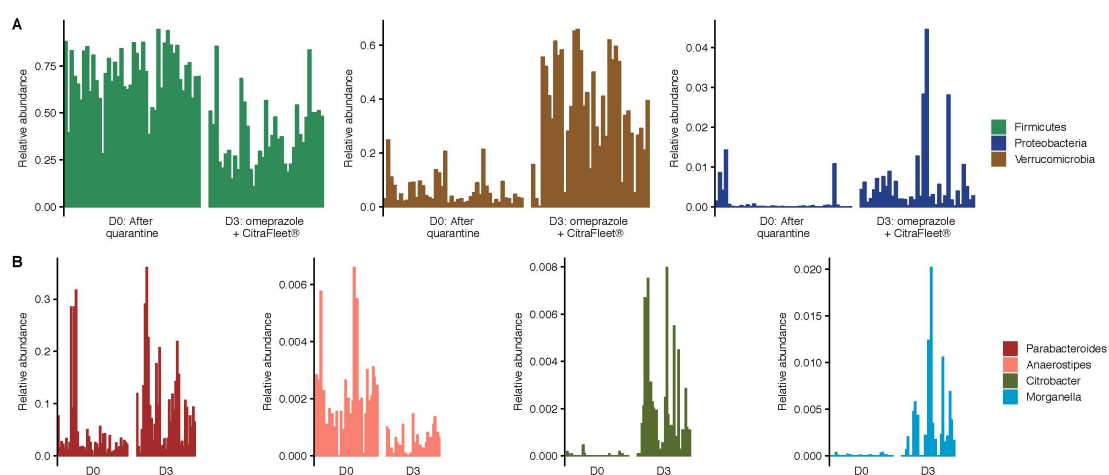

**Supplementary Figure S1. Effect of omeprazole followed by CitraFleet® on the faecal microbiome of rats in groups B-OM-CIT, C-HST1, D-DSS, Dw-DSS, E-HST2 and Ew-HST2.** Comparisons were made between the day after quarantine (day 0) and the day after the first CitraFleet® administration (day 3). (A) At the phylum level. (B) At the genus level. Only significant changes in the relative abundance of different phyla and among the top 4 genera are shown (pairwise Wilcoxon signed rank test, FDR < 0.05).

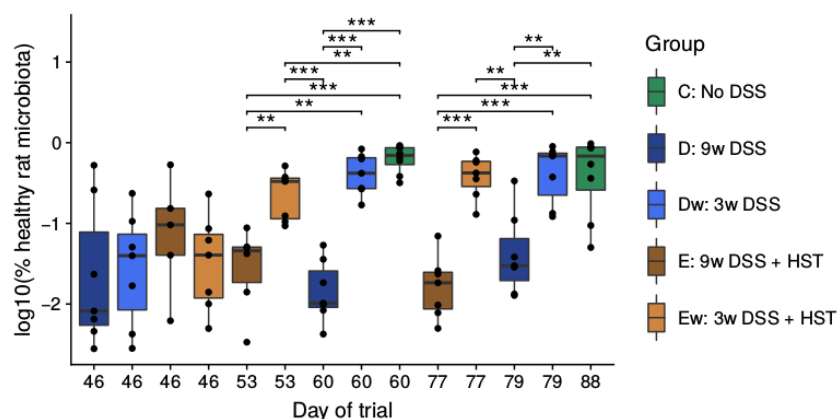

**Supplementary Figure S2. Proportion of predicted healthy microbiota in rats allocated to groups C (C-HST), D (D-DSS), Dw (Dw-DSS), E (E-HST2) and Ew (Ew-HST2), using the SourceTracker software.** Significant differences were found between rat groups receiving DSS until the end of the trial and groups for which DSS was withdrawn (Mann-Whitney U test; p<0.05)
